# Supplementary material for: The occurrence of methyl, ethyl, propyl, and butyl parabens in the urban rivers and stormwaters of Sydney, Australia
Source: Royal Society of Chemistry journal article supplement (doi:10.1039/c5ew00240k), 2016-01-01

**Appendix 1.** Supplementary material: Map of sample sites in Sydney, NSW, Australia, with land use mesh blocks and major waterways

## SYDNEY LAND USE CATEGORIES FOR SAMPLE SITES

Created by Wendy Evans

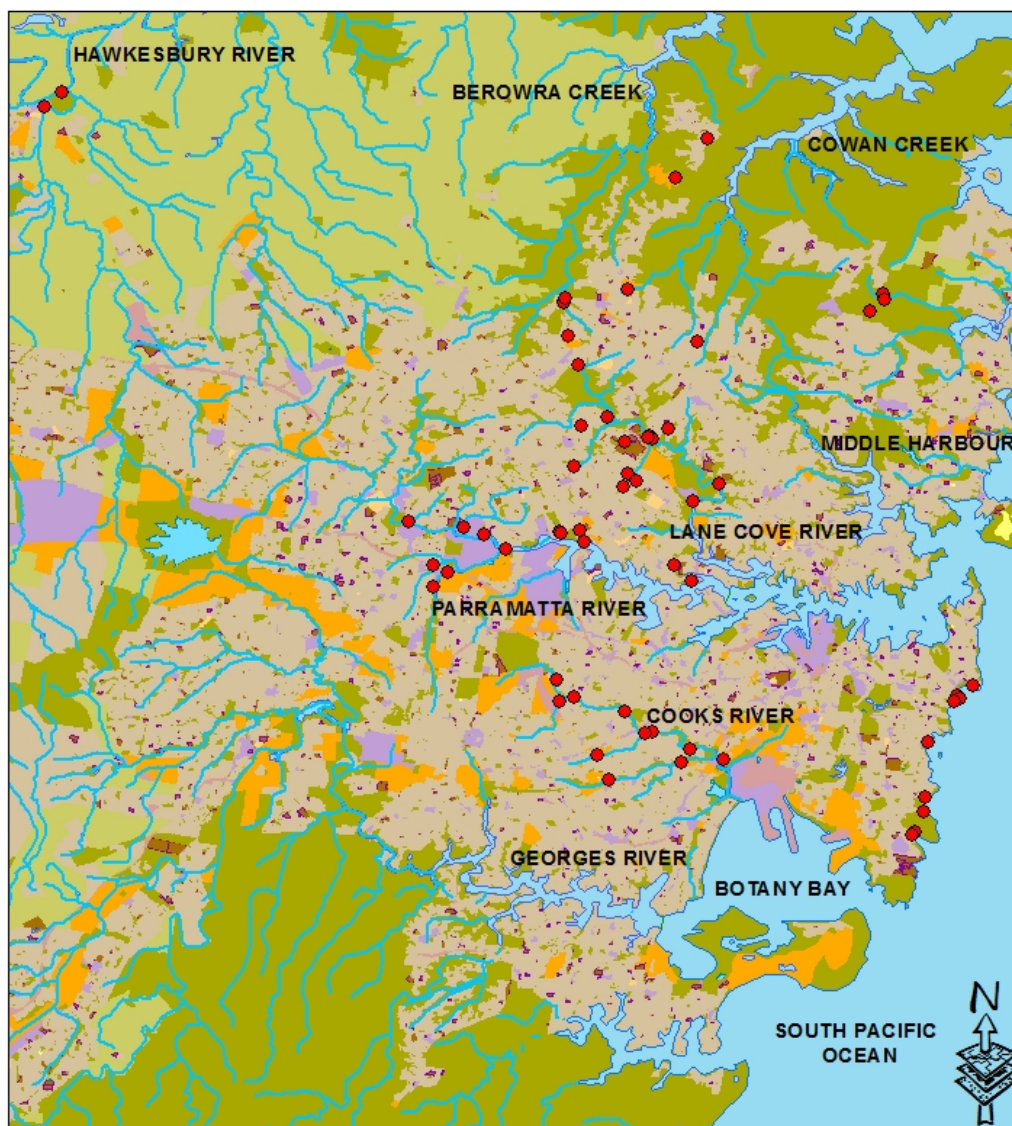

### Greater Sydney Land Use

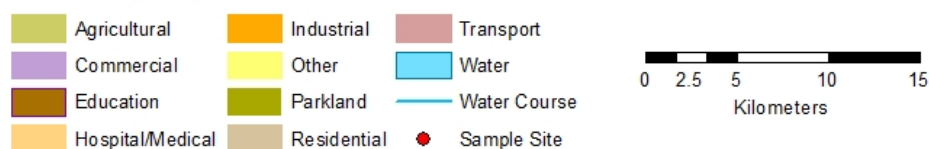

Supplement: c5ew00240k1.pdf [file c5ew00240k1.pdf]
